# Supplementary material for: Discovery and characterization of a novel pathogen Erwinia pyri sp. nov. associated with pear dieback: taxonomic insights and genomic analysis
Source: Front Microbiol. 2024 May 9;15:1365685. doi: 10.3389/fmicb.2024.1365685 (PMC11111954; doi:10.3389/fmicb.2024.1365685)
Supplement: Supplementary file 8 [file Table_8.DOCX]

| **TABLE S8** | Prediction of virulence genes of the strain DE2 in VFDB | | | | | |
| --- | --- | --- | --- | --- | --- |
| **virulence factors category** | **Specific virulence factors** | **numbers** | | | |
| Adherence | Type IV pili | 13 | | | |
| Trw type IV secretion system | 1 | | | |
| TCP | 1 | | | |
| Tap type IV pili | 2 | | | |
| S fimbriae | 1 | | | |
| Polar flagella | 25 | | | |
| P5 protein | 1 | | | |
| P fimbriae | 1 | | | |
| MSHA pili | 1 | | | |
| MAM7 | 1 | | | |
| LPS | 1 | | | |
| LOS | 1 | | | |
| Lap | 4 | | | |
| IlpA | 1 | | | |
| Hsp60 | 1 | | | |
| Flagella | 3 | | | |
| FHA | 1 | | | |
| EF-Tu | 2 | | | |
| Capsule | 4 | | | |
| CadF | 2 | | | |
| Antimicrobial activity/Competitive advantage | AcrAB | 5 | | | |
| FarAB | 6 | | | |
| Biofilm | BopD | 5 | | | |
| Csu fimbriae | 2 | | | |
| AdeFGH efflux pump | 8 | | | |
| Quorum-sensing | 1 | | | |
| Effector delivery system | RicA | 1 | | | |
| T4SS effectors | 4 | | | |
| T6SS | 8 | | | |
| Dot/Icm | 2 | | | |
| HSI-I | 4 | | | |
| TTSS | 6 | | | |
| T3SS1 | 3 | | | |
| Exe T2SS | 1 | | | |
| T3SS | 1 | | | |
| Rvh T4SS | 1 | | | |
| VirB type IV secretion system | 3 | | | |
| Exoenzyme | TlyC | 2 | | | |
| Aureolysin | 1 | | | |
| Exotoxin | The repeat in toxin | | 8 | | |
| BopD | | 7 | | |
| Phospholipase D | | 1 | | |
| alpha-Hemolysin | | 5 | | |
| Beta-hemolysin/cytolysin | | 14 | | |
| Hemolysin III | | 1 | | |
| Colibactin | | 7 | | |
| Exolysin | | 2 | | |
| Cya | | 3 | | |
| Hemolysin | | 3 | | |
| RTX toxin | | 2 | | |
| Cytolysin | | 1 | | |
| Hemolysin, HlyA | | 1 | | |
| Ptx | | 1 | | |
| Immune modulation | Alginate regulation | | 4 | | |
| Capsule | | 22 | | |
| Capsule I | | 2 | | |
| Alginate | | 7 | | |
| LOS | | 29 | | |
| OatA | | 1 | | |
| O-antigen | | 1 | | |
| LPS | | 8 | | |
| Rck | | 1 | | |
| Invasion | Invasin B/Ifp | | 1 | | |
| Flagella | | 45 | | |
| Bsa T3SS | | 1 | | |
| TTSS | | 1 | | |
| OmpA | | 1 | | |
| Motility | peritrichous flagella | | 24 | | |
| polar flagella | | 4 | | |
| Pse5Ac7Ac | | 1 | | |
| Pse5Ac7Ac, Pse5Ac7Am, Pse8OAc, Pse5Am7AcGlnAc | | 3 | | |
| Flagella | | 2 | | |
| Lateral flagella | | 1 | | |
| Nutritional/Metabolic factor | Acinetobactin | | 7 | | |
| Allantio+E348:E496n utilization | | 1 | | |
| Allantion utilization | | 7 | | |
| amonabactin | | 1 | | |
| Biotin synthesis | | | 3 | |
| CcmC | | | 1 | |
| Chu | | | 3 | |
| Cytochrome c maturation locus | | | 5 | |
| Ent | | | 5 | |
| Enterobactin | | | 3 | |
| FbpABC | | | 28 | |
| FeoAB | | | 1 | |
| FupA | | | 1 | |
| GGT | | | 2 | |
| HitABC | | | 17 | |
| Legiobactin | | | 2 | |
| MgtBC | | | 3 | |
| Mycobactin | | | 2 | |
| Phenazines biosynthesis | | | 3 | |
| Purine biosynthesis | | | 1 | |
| Pyochelin | | | 4 | |
| pyoverdine | | | 33 | |
| Pyrimidine biosynthesis | | | 4 | |
| Rhizoferrin | | | 1 | |
| Sal | | | 3 | |
| Salmochelin siderophore | | | 3 | |
| Shu | | | 3 | |
| Ybt | | | 2 | |
| Post-translational modification | Mip | | | 1 | |
| PrsA2 | | | 1 | |
| Regulation | CdpA | | | 11 | |
| BfmRS | | | 10 | |
| PhoP/R | | | 6 | |
| PhoP | | | 4 | |
| RelA | | | 2 | |
| AI-2 | | | 1 | |
| RcsAB | | | 3 | |
| Quorom sensing | | | 1 | |
| Stress survival | SodB | | | 1 | |
| KatAB | | | 1 | |
| ClpC | | | 2 | |
| RecN | | | 1 | |
| KatA | | | 1 | |
| SodCI | | | | 1 |
| MsrAB | | | | 1 |
| MntABC | | | | 3 |
| ClpP | | | | 1 |
| Others | Isocitrate lyase | | | | 1 |
